# Supplementary material
Source: Springer Nature journal article supplement (https://www.springermedizin.de/resource/supplementary/12961_2006_43_MOESM1_ESM.pdf/9571290)
Supplement: MOESM1 [file 9571290]

**Find the  
guidelines**

**Analyse the  
content**

**Look at the gaps**

**Develop  
Recommendations  
using CJF**

**Appraise the  
guidelines**

**Permission to  
adapt**

**Look at the  
sources**

**What are the  
cultural and  
consumer issues?**

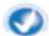

AGREE
